# Supplementary material for: Synthesis, structure and aromaticity of metallapyridinium complexes
Source: Royal Society of Chemistry journal article supplement (doi:10.1039/d1dt04096k), 2022-01-01
Supplement: d1dt04096k1.pdf [file d1dt04096k1.pdf]

## Synthesis, Structure and Aromaticity of Metallapyridinium Complexes

Yilun Wang<sup>†</sup>,<sup>[a,b]</sup> Yue Sun<sup>†</sup>,<sup>[a]</sup> Wei Bai,<sup>\*[a]</sup> Yan Zhou,<sup>[c]</sup> Xiao Bao,<sup>[a]</sup> and Yang Li<sup>\*[a,b]</sup>

<sup>a</sup> State Key Laboratory of Fine Chemicals, Department of Chemistry, School of Chemical Engineering, Dalian University of Technology, Liaoning 116024, P.R. China

<sup>b</sup> School of Chemical Engineering, Dalian University of Technology, Panjin, Liaoning 124221, P.R. China

<sup>c</sup> School of Chemistry and Chemical Engineering, Guangxi University for Nationalities, Guangxi Key Laboratory of Chemistry and Engineering of Forest Products, Key Laboratory of Guangxi Colleges and Universities for Food Safety and Pharmaceutical Analytical Chemistry, Nanning, 530008, P.R. China

### Supporting Information

#### Table of Contents

|                                                                         |                |
|-------------------------------------------------------------------------|----------------|
| <b>1. Computational details</b>                                         | <b>S2-S13</b>  |
| <b>2. X-ray crystallographic study of complexes 2 and 4<sup>+</sup></b> | <b>S14</b>     |
| <b>3. NMR spectra</b>                                                   | <b>S15-S20</b> |
| <b>4. The Calculated Cartesian Coordinates</b>                          | <b>S21-S24</b> |
| <b>5. Reference</b>                                                     | <b>S25</b>     |

## 1. Computational details

All the optimizations were performed with the Gaussian 16 software package.<sup>[1]</sup> All of these structures evaluated were optimized at the B3LYP level of density functional theory (DFT).<sup>[2]</sup> DFT/GENECP level had been done by implementing def2-TZVP basis set for Re atom.<sup>[3]</sup> On the other hand, 6-311G(2d,p) basis set had been used for the rest of atoms.<sup>[4]</sup> Nucleus-independent chemical shift (NICS) values were calculated at the B3LYP-GIAO//6-311G(2d,p)/def2-TZVP level, whereas we performed the CMO-NICS calculations in simplified models with the NBO 7.0 program.<sup>[5]</sup> The iso-chemical shielding surface (ICSS) is a method closely related to NICS. It calculates the grid point data of magnetic shielding value in three-dimensional space and draws the contour map. The ICSS<sub>ZZ</sub> is a real space function, which can clearly show the shielding or deshielding effect of the external magnetic field in the direction perpendicular to the ring. Unlike the NICS<sub>ZZ</sub> values, the positive value of ICSS<sub>ZZ</sub> indicates the shielding effect of the external magnetic field at this point, and the absolute values of the two parameters are the same. The anisotropy of the current density was calculated with the AICD 2.0 program computing the NMR properties using the CSGT method with the Gaussian16 Rev A.03 program with the geometries previously obtained for **M-N** and **M-N-H**.<sup>[6]</sup> GIMIC analysis was finished by GIMIC code<sup>[7]</sup> based on the formatted check point file of Gaussian and rendered by ParaView visualization program.<sup>[8]</sup> Using RunEDDB script,<sup>[9]</sup> electron density of delocalized bond (EDDB)<sup>[10]</sup> based on natural atomic orbitals (NAOs) is analyzed. The molecular orbital composition and MO pictures were analyzed using Multiwfn, a multifunctional wavefunction analyzer.<sup>[11]</sup> The calculations of MCI and ELF $\pi$  were also carried out by Multiwfn package. If the MCI value is high and the difference in the bifurcation value ( $\Delta BV(ELF\pi)$ ) is small, then the  $\pi$  electrons should be highly delocalized and the species should be aromatic. The MO pictures were drawn using the software of VMD.<sup>[12]</sup> VMD was developed by the Theoretical and Computational Biophysics Group in the Beckman Institute for Advanced Science and Technology at the University of Illinois at Urbana-Champaign (<http://www.ks.uiuc.edu/Research/vmd/>).

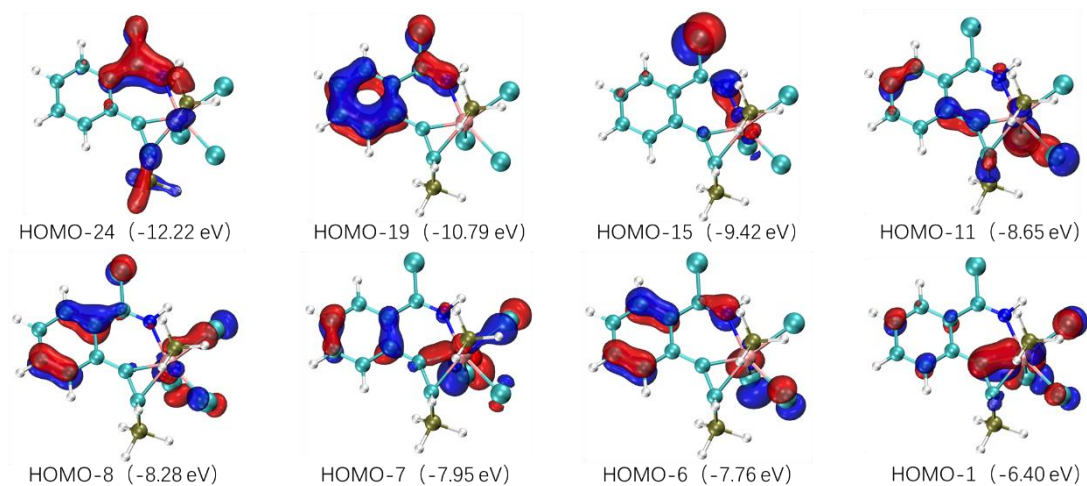

**Figure S1.** Key occupied  $\pi$ -MOs of **M-N**. The isosurface of MOs is 0.04.

**Table S1.** Full Cartesian NMR shielding tensor (ppm) for NICS values of  $\pi$ -Canonical MO contributions in **M-N** (NICS(1)<sub>zz</sub> and NICS(-1)<sub>zz</sub> are the NICS(1)<sub>zz</sub> values of the upper and lower directions of the rings, respectively. Orbital 93 is HOMO).

| MO  | NICS (0) <sub>zz</sub><br>for <b>3MR</b> | NICS (0) <sub>zz</sub><br>for <b>6MR</b> | NICS(1) <sub>zz</sub><br>for <b>3MR</b> | NICS(-1) <sub>zz</sub><br>for <b>3MR</b> | NICS(1) <sub>zz</sub><br>for <b>6MR</b> | NICS(-1) <sub>zz</sub><br>for <b>6MR</b> |
|-----|------------------------------------------|------------------------------------------|-----------------------------------------|------------------------------------------|-----------------------------------------|------------------------------------------|
| 69  | 3.94                                     | 6.05                                     | 3.6                                     | 3.69                                     | 4.85                                    | 5.43                                     |
| 74  | 3.38                                     | 6                                        | 3.11                                    | 2.85                                     | 5.08                                    | 5.05                                     |
| 78  | 2.09                                     | 2.27                                     | 2.19                                    | 1.44                                     | 2.15                                    | 1.82                                     |
| 82  | -4.95                                    | -0.17                                    | -3.65                                   | -3.8                                     | -0.01                                   | -0.15                                    |
| 85  | 0.72                                     | -3.45                                    | 0.87                                    | -0.27                                    | -3.86                                   | -1.81                                    |
| 86  | -0.75                                    | -2.58                                    | -2.1                                    | -2.28                                    | -1.15                                   | -1.91                                    |
| 87  | -3.67                                    | -3.73                                    | -3.04                                   | -1.53                                    | -3.37                                   | -2.89                                    |
| 92  | -5.19                                    | -1.32                                    | -4.27                                   | -5.88                                    | -0.78                                   | -1.51                                    |
| sum | -4.43                                    | 3.07                                     | -3.29                                   | -5.78                                    | 2.91                                    | 4.03                                     |

The signs of the NICS values are reversed from those of the shielding data in the output. Thus, the NICS value is the negative of the sum of the shielding contributions.

Thus, NICS(0)<sub>ZZ- $\pi$</sub>  value of **3MR** is +4.43 ppm; NICS(0)<sub>ZZ- $\pi$</sub>  value of **6MR** is -3.07 ppm; NICS(1)<sub>ZZ- $\pi$</sub>  value of **3MR** is the mean value of NICS(1)<sub>ZZ- $\pi$</sub>  and NICS(-1)<sub>ZZ- $\pi$</sub> :  $-(-3.29 - 5.78) / 2 = 4.535$  ppm; NICS(1)<sub>ZZ- $\pi$</sub>  value of **6MR** is -3.47 ppm.

**Table S2.** Full Cartesian NMR shielding tensor (ppm) for NICS values of  $\sigma$ -Canonical MO contributions in **M-N** (NICS(1)<sub>ZZ</sub> and NICS(-1)<sub>ZZ</sub> are the NICS(1)<sub>ZZ</sub> values of the upper and lower directions of the rings, respectively) .

| MO | NICS (0) <sub>ZZ</sub> | NICS (0) <sub>ZZ</sub> | NICS(1) <sub>ZZ</sub> | NICS(-1) <sub>ZZ</sub> | NICS(1) <sub>ZZ</sub> | NICS(-1) <sub>ZZ</sub> |
|----|------------------------|------------------------|-----------------------|------------------------|-----------------------|------------------------|
|    | for <b>3MR</b>         | for <b>6MR</b>         | for <b>3MR</b>        | for <b>3MR</b>         | for <b>6MR</b>        | for <b>6MR</b>         |
| 45 | 4.79                   | 8.72                   | 4.31                  | 3.77                   | 5.35                  | 5.54                   |
| 46 | 4.19                   | 6.22                   | 4.13                  | 3.85                   | 5.25                  | 5.25                   |
| 47 | 1.14                   | 1.75                   | 1                     | 0.96                   | 0.95                  | 1.03                   |
| 48 | 7.19                   | 4.43                   | 5.31                  | 4.18                   | 3.67                  | 3.52                   |
| 49 | 3.34                   | 6.12                   | 3.31                  | 2.91                   | 4.19                  | 4.21                   |
| 50 | 3.85                   | 2.7                    | 3.35                  | 2.67                   | 2.39                  | 2.27                   |
| 51 | 1.41                   | 0.41                   | 1.02                  | 0.6                    | 0.38                  | 0.34                   |
| 52 | 0.64                   | 0.63                   | 0.68                  | 0.45                   | 0.57                  | 0.52                   |
| 53 | 0.63                   | 0.36                   | 0.24                  | 0.31                   | 0.42                  | 0.46                   |
| 54 | 4.56                   | 2.57                   | 2.29                  | 2.69                   | 2.41                  | 2.19                   |
| 55 | 1.57                   | 1.68                   | 0.95                  | 2.61                   | 1.18                  | 2.42                   |
| 56 | 4.13                   | 3.7                    | 2.74                  | 2.58                   | 2.78                  | 2.76                   |
| 57 | 3.58                   | 4.52                   | 2.56                  | 2.4                    | 2.87                  | 2.77                   |
| 58 | 2.14                   | 1.3                    | 1.73                  | 1.62                   | 2.23                  | 2.15                   |
| 59 | 3.42                   | 1.94                   | 2.27                  | 1.76                   | 2.01                  | 1.83                   |
| 60 | 2.67                   | 1.67                   | 0.19                  | -0.31                  | 1.61                  | 1.53                   |
| 61 | 3.72                   | 5.1                    | 2.67                  | 2.2                    | 3.05                  | 3.17                   |
| 62 | -1.61                  | -3.3                   | -1.34                 | -1.53                  | -1.52                 | -1.41                  |
| 63 | 2.02                   | 1.73                   | 1.76                  | 1.42                   | 1.69                  | 1.9                    |
| 64 | -3.13                  | -4.75                  | -2.68                 | -2.61                  | -2.47                 | -2.74                  |

|     |       |        |       |       |       |       |
|-----|-------|--------|-------|-------|-------|-------|
| 65  | 0.63  | 0.89   | -1.13 | 0.66  | 0.98  | 0.7   |
| 66  | -0.23 | -0.27  | -1.09 | 0.08  | -0.35 | -0.21 |
| 67  | -0.6  | -4.67  | -1.37 | -0.29 | -3.03 | -3.04 |
| 68  | 2.47  | 3.09   | 2.1   | 1.35  | 2.68  | 2.74  |
| 70  | -0.14 | 0.36   | 0.1   | -0.91 | 0.43  | -0.14 |
| 71  | 0.83  | -0.24  | 0.69  | 1.11  | 0.03  | -0.95 |
| 72  | 3.76  | -9.9   | 1     | 1.15  | -4.98 | -4.93 |
| 73  | -3.64 | -6.44  | -4.33 | -4.24 | -5.04 | -4.88 |
| 75  | -4.34 | -5.58  | -3.78 | -3.4  | -3.87 | -4.04 |
| 76  | -2.84 | -5.58  | -4.03 | -3.83 | -4.25 | -4.29 |
| 77  | -5.59 | -9.7   | -1.52 | -1.89 | -3.57 | -4.19 |
| 79  | -2.61 | -5.64  | -1.81 | -1.48 | -3.4  | -3.59 |
| 80  | 2.54  | 2.76   | 1.67  | 1.97  | 2.13  | 2.39  |
| 81  | 10.8  | -3.73  | 4.91  | 4.26  | -0.86 | -0.91 |
| 83  | -3.37 | -4.5   | -4.22 | -4.36 | -2.76 | -2.59 |
| 84  | 2.31  | -10.7  | -1.26 | 1.11  | -6.55 | -6.93 |
| 89  | -2.16 | -4.91  | 0.62  | -0.48 | -3.3  | -2.75 |
| 91  | 0.07  | -3.6   | -2.83 | -4.14 | -3.39 | -2.94 |
| sum | 48.14 | -20.86 | 20.21 | 19.2  | -0.09 | -0.84 |

---

The signs of the NICS values are reversed from those of the shielding data in the output. Thus, the NICS value is the negative of the sum of the shielding contributions. Thus,  $\text{NICS}(0)_{\text{ZZ-}\sigma}$  value of **3MR** is -48.14 ppm;  $\text{NICS}(0)_{\text{ZZ-}\sigma}$  value of **6MR** is 20.86 ppm;  $\text{NICS}(1)_{\text{ZZ-}\sigma}$  value of **3MR** is the mean value of  $\text{NICS}(1)_{\text{ZZ-}\sigma}$  and  $\text{NICS}(-1)_{\text{ZZ-}\sigma}$ :  $-(20.21 + 19.2) / 2 = -19.705$  ppm;  $\text{NICS}(1)_{\text{ZZ-}\sigma}$  value of **6MR** is -0.465 ppm.

**Table S3.** The positive and negative values of total induced currents contributed by the diatropic and paratropic currents

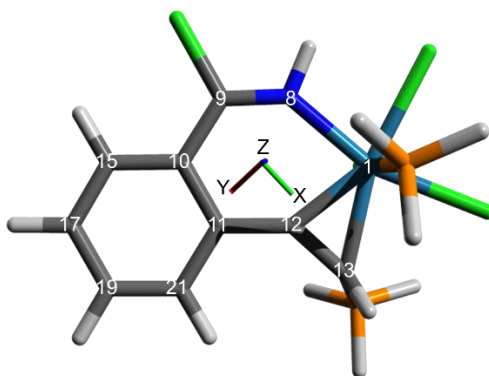

| Bond  | diatropic contribution | paratropic contribution | Total induced current |
|-------|------------------------|-------------------------|-----------------------|
| 1-8   | 14.155874              | -6.941062               | 7.214812              |
| 8-9   | 14.759157              | -6.163534               | 8.595624              |
| 9-10  | 11.934445              | -4.043308               | 7.891137              |
| 10-15 | 15.908407              | -5.260412               | 10.647995             |
| 15-17 | 16.625262              | -4.977776               | 11.647486             |
| 17-19 | 16.436973              | -4.803325               | 11.633647             |
| 19-21 | 16.521090              | -4.745870               | 11.775220             |
| 21-11 | 15.882286              | -4.963869               | 10.918416             |
| 11-12 | 13.362162              | -5.417693               | 7.944470              |
| 12-13 | 12.811744              | -0.139580               | 12.672165             |
| 13-1  | 11.647764              | -0.542425               | 11.105340             |

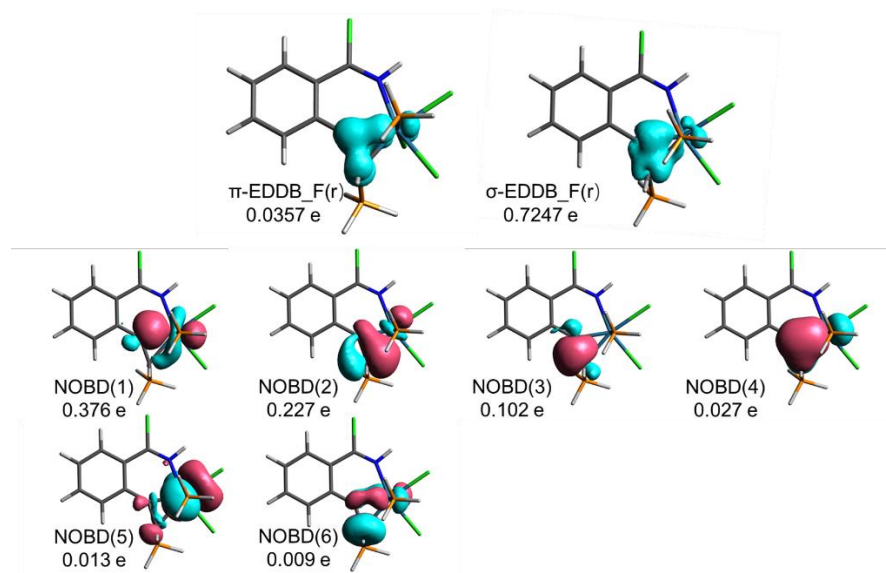

**Figure S2.** EDDB\_F(r) results for the 3MR in M-N and key NOBDs of the ring. Isovalues are 0.0003, 0.008 for  $\pi$ -EDDB\_F(r),  $\sigma$ -EDDB\_F(r), respectively. Isovalue for NOBD contours is 0.040.

Natural orbitals for bond delocalization (NBODs) computed for the **3MR** indicate that the main  $\sigma$  bondings (NOBD(1–3, 5) in Figure S2) between the metal center and two carbon atoms account for the  $\sigma$ -electron delocalization involving in-plane overlap of metal d and carbon p orbitals; whereas the  $\pi$  delocalization is minor, as shown in NOBD(4, 6).

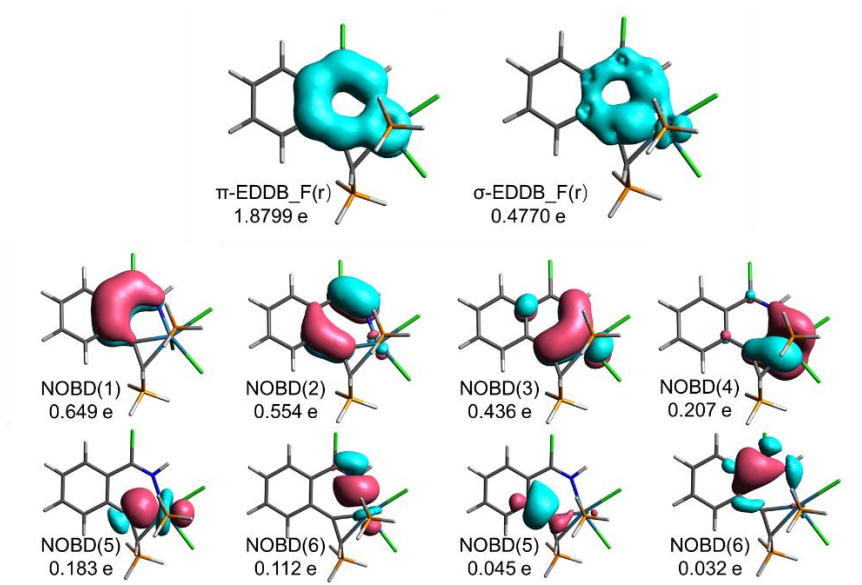

**Figure S3.** EDDB\_F(r) results for the **6MR** in **M-N** and key NOBDs of the ring. Isovalues are 0.005, 0.004 for  $\pi$ -EDDB\_F(r),  $\sigma$ -EDDB\_F(r), respectively. Isovalue for NOBD contours is 0.040.

Natural orbitals for bond delocalization (NBODs) computed for the **6MR** indicate that the  $\pi$  delocalization is major (as shown in NOBD(1-4)).

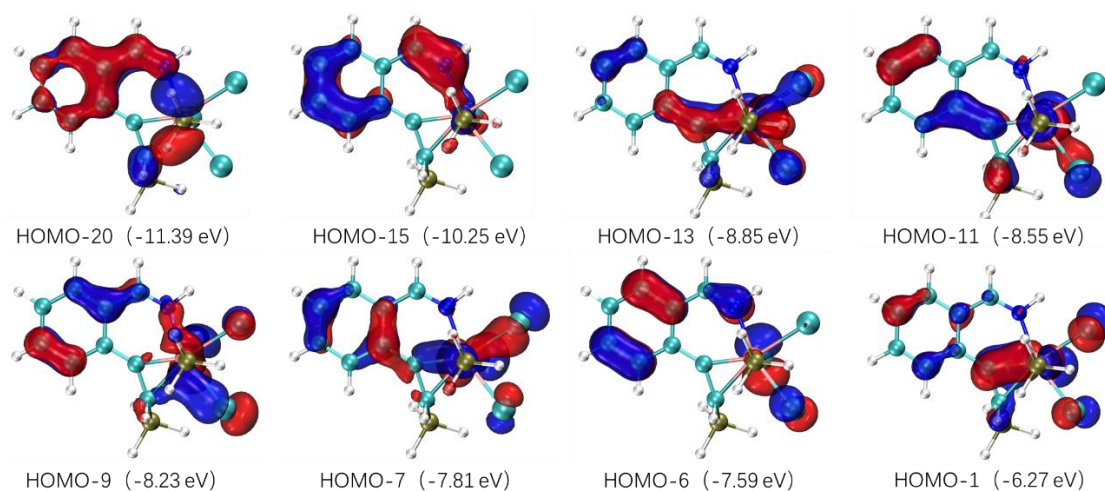

**Figure S4.** Key occupied  $\pi$ -MOs of **M-N-H**. The isosurface of MOs is 0.04.

**Table S4.** Full Cartesian NMR shielding tensor (ppm) for NICS values of  $\pi$ -Canonical MO contributions in **M-N-H** (NICS(1)<sub>zz</sub> and NICS(-1)<sub>zz</sub> are the NICS(1)<sub>zz</sub> values of the upper and lower directions of the rings, respectively. Orbital 85 is HOMO).

| MO  | NICS (0) <sub>zz</sub><br>for <b>3MR</b> | NICS (0) <sub>zz</sub><br>for <b>6MR</b> | NICS(1) <sub>zz</sub><br>for <b>3MR</b> | NICS(-1) <sub>zz</sub><br>for <b>3MR</b> | NICS(1) <sub>zz</sub><br>for <b>6MR</b> | NICS(-1) <sub>zz</sub><br>for <b>6MR</b> |
|-----|------------------------------------------|------------------------------------------|-----------------------------------------|------------------------------------------|-----------------------------------------|------------------------------------------|
| 65  | 3.08                                     | 4.77                                     | 2.99                                    | 2.38                                     | 4.18                                    | 3.67                                     |
| 70  | 4.12                                     | 6.45                                     | 3.13                                    | 3.8                                      | 5.45                                    | 5.2                                      |
| 72  | 2.46                                     | 2.81                                     | 1.77                                    | 1.84                                     | 2.25                                    | 2.42                                     |
| 74  | -4.12                                    | -0.19                                    | -3.36                                   | -2.93                                    | -0.08                                   | -0.28                                    |
| 76  | 0.02                                     | -0.46                                    | -2.09                                   | 1.89                                     | -0.31                                   | -0.01                                    |
| 78  | -0.13                                    | -2.98                                    | -1.32                                   | -1.83                                    | -1.31                                   | -2.21                                    |
| 79  | -4.46                                    | -3.9                                     | -4                                      | -2.22                                    | -3.46                                   | -3.07                                    |
| 84  | -5.52                                    | -0.73                                    | -4.6                                    | -6.21                                    | -0.26                                   | -1                                       |
| sum | -4.55                                    | 5.77                                     | -7.48                                   | -3.28                                    | 6.46                                    | 4.72                                     |

The signs of the NICS values are reversed from those of the shielding data in the output. Thus, the NICS value is the negative of the sum of the shielding contributions.



Thus, NICS(0)<sub>ZZ- $\pi$</sub>  value of **3MR** is 4.55 ppm; NICS(0)<sub>ZZ- $\pi$</sub>  value of **6MR** is -5.77 ppm; NICS(1)<sub>ZZ- $\pi$</sub>  value of **3MR** is the mean value of NICS(1)<sub>ZZ- $\pi$</sub>  and NICS(-1)<sub>ZZ- $\pi$</sub> :  $-(7.48-3.28) / 2 = 5.38$  ppm; NICS(1)<sub>ZZ- $\pi$</sub>  value of **6MR** is -5.59 ppm.

**Table S5.** Full Cartesian NMR shielding tensor (ppm) for NICS values of  $\sigma$ -Canonical MO contributions in **M-N-H** (NICS(1)<sub>ZZ</sub> and NICS(-1)<sub>ZZ</sub> are the NICS(1)<sub>ZZ</sub> values of the upper and lower directions of the rings, respectively) .

| MO | NICS (0) <sub>ZZ</sub><br>for <b>3MR</b> | NICS (0) <sub>ZZ</sub><br>for <b>6MR</b> | NICS(1) <sub>ZZ</sub><br>for <b>3MR</b> | NICS(-1) <sub>ZZ</sub><br>for <b>3MR</b> | NICS(1) <sub>ZZ</sub><br>for <b>6MR</b> | NICS(-1) <sub>ZZ</sub><br>for <b>6MR</b> |
|----|------------------------------------------|------------------------------------------|-----------------------------------------|------------------------------------------|-----------------------------------------|------------------------------------------|
| 40 | 5.66                                     | 10.1                                     | 5.06                                    | 4.45                                     | 6.1                                     | 6.3                                      |
| 41 | 4.25                                     | 6.07                                     | 4.17                                    | 3.88                                     | 5.12                                    | 5.18                                     |
| 42 | 7.18                                     | 4.81                                     | 5.47                                    | 4.33                                     | 3.93                                    | 3.75                                     |
| 43 | 3.3                                      | 5.85                                     | 3.2                                     | 2.98                                     | 4.31                                    | 4.46                                     |
| 44 | 4.12                                     | 3.03                                     | 3.58                                    | 2.8                                      | 2.53                                    | 2.4                                      |
| 45 | 1.38                                     | 0.44                                     | 1.02                                    | 0.6                                      | 0.4                                     | 0.35                                     |
| 46 | 0.67                                     | 0.64                                     | 0.69                                    | 0.47                                     | 0.59                                    | 0.55                                     |
| 47 | 0.69                                     | 0.35                                     | 0.27                                    | 0.34                                     | 0.42                                    | 0.46                                     |
| 48 | 4.24                                     | 2.67                                     | 2.18                                    | 2.6                                      | 2.43                                    | 2.24                                     |
| 49 | 1.67                                     | 1.79                                     | 0.99                                    | 2.65                                     | 1.31                                    | 2.46                                     |
| 50 | 4.17                                     | 3.53                                     | 2.46                                    | 2.38                                     | 2.93                                    | 2.94                                     |
| 51 | 3.82                                     | 5.3                                      | 2.91                                    | 2.7                                      | 3.14                                    | 3.09                                     |
| 52 | 2.64                                     | 2.52                                     | 2.08                                    | 1.89                                     | 2.84                                    | 2.77                                     |
| 53 | 3.33                                     | 1.74                                     | 2.12                                    | 1.56                                     | 1.72                                    | 1.54                                     |
| 54 | 3.01                                     | 3.89                                     | 2.75                                    | 2.41                                     | 2.64                                    | 2.68                                     |
| 55 | 3.96                                     | 3.6                                      | 0.97                                    | 0.29                                     | 2.63                                    | 2.61                                     |
| 56 | -1.56                                    | -2.67                                    | -1.28                                   | -1.54                                    | -1.15                                   | -0.94                                    |
| 57 | 2.9                                      | 2.08                                     | 2.35                                    | 2.77                                     | 2.15                                    | 2.07                                     |
| 58 | -0.9                                     | -3.09                                    | -0.78                                   | -0.93                                    | -1.74                                   | -2.02                                    |
| 59 | -3.23                                    | -3.16                                    | -2.94                                   | -2.2                                     | -2.54                                   | -2                                       |

|     |        |        |       |       |       |       |
|-----|--------|--------|-------|-------|-------|-------|
| 60  | 1.52   | 1.04   | -1.47 | 0.57  | 1.28  | 0.78  |
| 61  | -2.55  | -6.02  | -2.88 | -1.94 | -3.98 | -3.97 |
| 62  | 1.25   | 1.12   | 1.1   | 0.37  | 1.04  | 1.12  |
| 63  | 2.66   | 4.05   | 2.21  | 2.88  | 3.19  | 3.9   |
| 64  | 0.61   | -0.28  | 0.67  | 0.16  | 0.02  | -1.08 |
| 66  | 4.44   | -9.73  | 1.33  | 1.59  | -5.29 | -5.27 |
| 67  | -3.15  | -6.65  | -4.21 | -4.13 | -4.78 | -4.69 |
| 68  | -5.25  | -7.68  | -4.65 | -4.65 | -5.45 | -5.66 |
| 69  | -0.32  | -4     | -1.7  | -2.94 | -2.88 | -2.78 |
| 71  | -10.25 | -13.91 | -3.65 | -3.36 | -5.63 | -6.7  |
| 73  | 10.31  | -3.92  | 4.73  | 4.04  | -0.93 | -0.95 |
| 75  | -3.76  | -4.41  | -2.92 | -5.25 | -2.56 | -2.61 |
| 77  | 3.88   | -12.13 | 1.43  | 0.42  | -8.51 | -6.67 |
| 81  | -2.14  | -4.82  | 0.63  | -0.39 | -3.24 | -2.7  |
| 83  | 0.08   | -3.57  | -2.9  | -4.19 | -3.34 | -2.96 |
| sum | 48.63  | -21.42 | 24.99 | 17.61 | -1.3  | 0.65  |

---

The signs of the NICS values are reversed from those of the shielding data in the output. Thus, the NICS value is the negative of the sum of the shielding contributions. Thus, NICS(0)<sub>ZZ-σ</sub> value of **3MR** is -48.63 ppm; NICS(0)<sub>ZZ-σ</sub> value of **6MR** is 21.42ppm; NICS(1)<sub>ZZ-σ</sub> value of **3MR** is the mean value of NICS(1)<sub>ZZ-σ</sub> and NICS(-1)<sub>ZZ-σ</sub>:  $-(24.99 + 17.61) / 2 = -21.3$  ppm; NICS(1)<sub>ZZ-σ</sub> value of **6MR** is 0.325ppm.

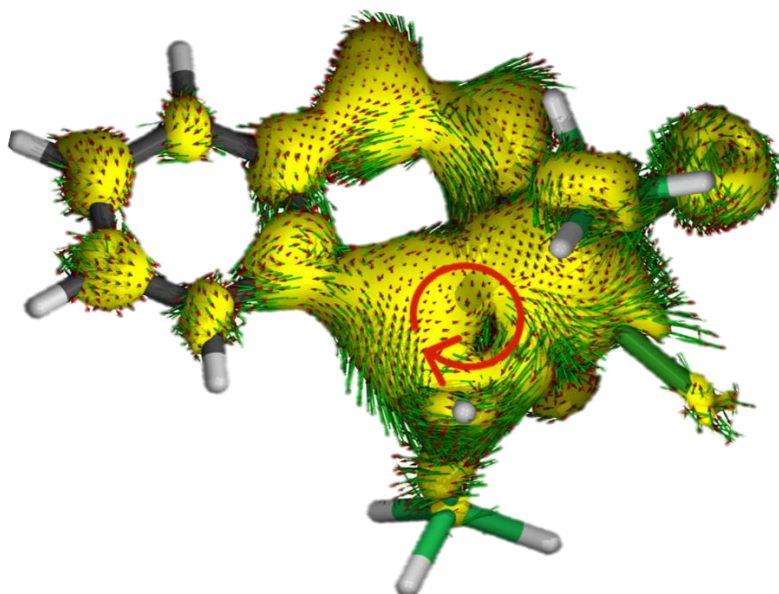

**Figure S5.** AICD isosurfaces of **M-N-H** separated into the  $\sigma$ -contribution (current density vectors are plotted onto the AICD isosurface of 0.030 and the magnetic field vector is orthogonal with respect to the ring plane and points upward (clockwise currents are diatropic)).

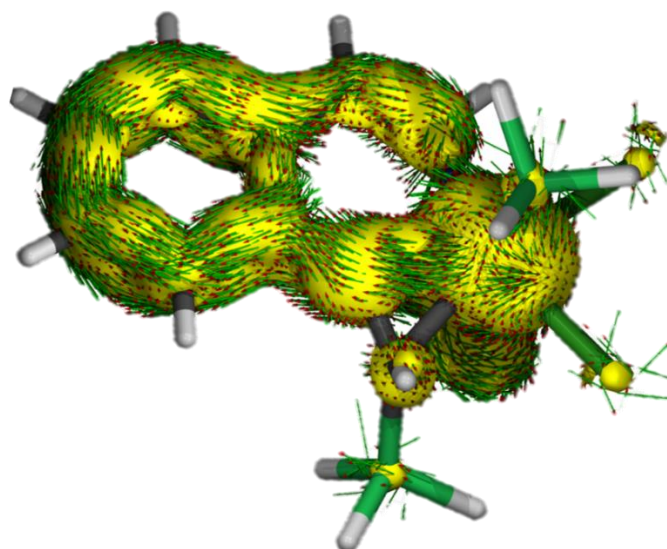

**Figure S6.** AICD isosurfaces of **M-N-H** separated into the  $\pi$ -contribution (current density vectors are plotted onto the AICD isosurface of 0.030 and the magnetic field vector is orthogonal with respect to the ring plane and points upward (clockwise currents are diatropic)).

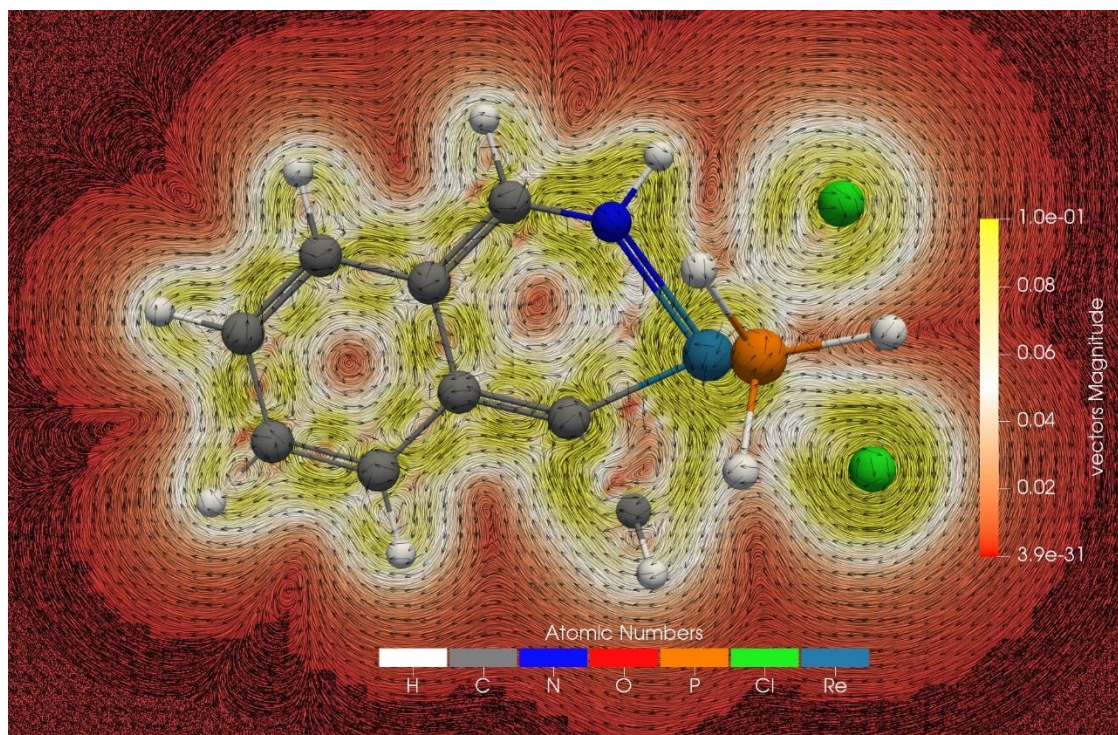

**Figure S7.** GIMIC map in the plane of **6MR** in **M-N-H**. In both maps, the magnetic field vector is orthogonal with respect to the ring plane and points upward (clockwise currents are diatropic).

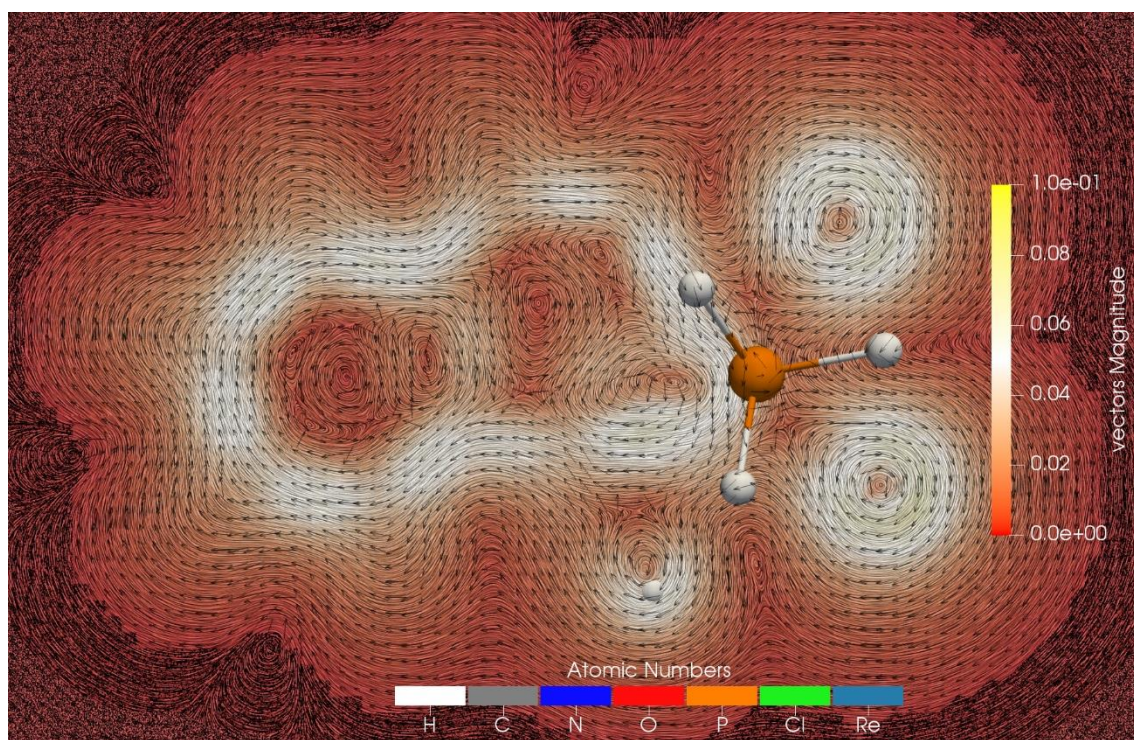

**Figure S8.** GIMIC map (1.5 Bohr above the **6MR**) in **M-N-H**. In both maps, the magnetic field vector is orthogonal with respect to the ring plane and points upward (clockwise currents are diatropic).

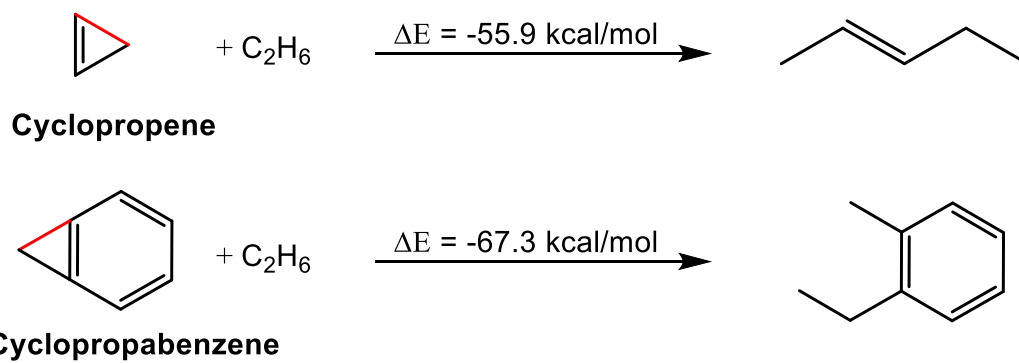

*Figure S9.* Isodesmic reactions for some non-metallic rings.

## 2. X-ray crystallographic study of complex **2** and **4<sup>+</sup>(BPh<sub>4</sub><sup>-</sup>)**

**Table S6.** Crystallographic data and refinement details for **2** and **4<sup>+</sup>(BPh<sub>4</sub><sup>-</sup>)**

|                                                    | <b>2</b>                                                           | <b>4<sup>+</sup>(BPh<sub>4</sub><sup>-</sup>)</b>                    |
|----------------------------------------------------|--------------------------------------------------------------------|----------------------------------------------------------------------|
| CCDC Number                                        | 2045090                                                            | 2081090                                                              |
| Empirical formula                                  | C <sub>35</sub> H <sub>32</sub> Cl <sub>4</sub> NP <sub>2</sub> Re | C <sub>75</sub> H <sub>71</sub> BCl <sub>3</sub> NOP <sub>3</sub> Re |
| Color & habit                                      | red, block                                                         | red, block                                                           |
| Crystal size (mm <sup>3</sup> )                    | 0.20 x 0.15 x 0.10                                                 | 0.35 x 0.20 x 0.10                                                   |
| Temperature (K)                                    | 173K                                                               | 190K                                                                 |
| Crystal system                                     | Monoclinic                                                         | Monoclinic                                                           |
| Space group                                        | <i>P2<sub>1</sub>/c</i>                                            | <i>P2<sub>1</sub>/c</i>                                              |
| a(Å)                                               | 17.0191(9)                                                         | 19.2784(8)                                                           |
| b(Å)                                               | 11.9932(6)                                                         | 22.0302(9)                                                           |
| c(Å)                                               | 17.2230(9)                                                         | 17.0720(7)                                                           |
|                                                    | 90                                                                 | 90                                                                   |
|                                                    | 108.585(2)                                                         | 106.1640(10)                                                         |
|                                                    | 90                                                                 | 90                                                                   |
| V(Å <sup>3</sup> ), Z                              | 3332.1(3), 4                                                       | 6964.0(5), 4                                                         |
| D <sub>cal</sub> (Mg/m <sup>3</sup> )              | 1.707                                                              | 1.334                                                                |
| Abs. coeff.(mm <sup>-1</sup> )                     | 4.090                                                              | 1.972                                                                |
| 2 θ range for data collection (°)                  | 4.232 to 54                                                        | 4.454 to 54                                                          |
| Reflections collected                              | 81767                                                              | 81767                                                                |
| Indep. Reflection, R(int)                          | 7271, 0.0463                                                       | 15113, 0.1040                                                        |
| Completeness of data                               | 99.9 %                                                             | 99.4 %                                                               |
| Data/ restraints / parameters                      | 7271/0/395                                                         | 15113/0/813                                                          |
| Goodness-of-fit on F <sup>2</sup>                  | 1.037                                                              | 0.950                                                                |
| R1 [I>2σ(I)], wR2                                  | 0.0159, 0.0386                                                     | 0.0507, 0.1013                                                       |
| R1 (all data), wR2                                 | 0.0173, 0.0391                                                     | 0.1070, 0.1156                                                       |
| Largest diff. peak and hole (e • Å <sup>-3</sup> ) | 0.78, -0.45                                                        | 1.26, -1.12                                                          |

### 3. NMR spectra

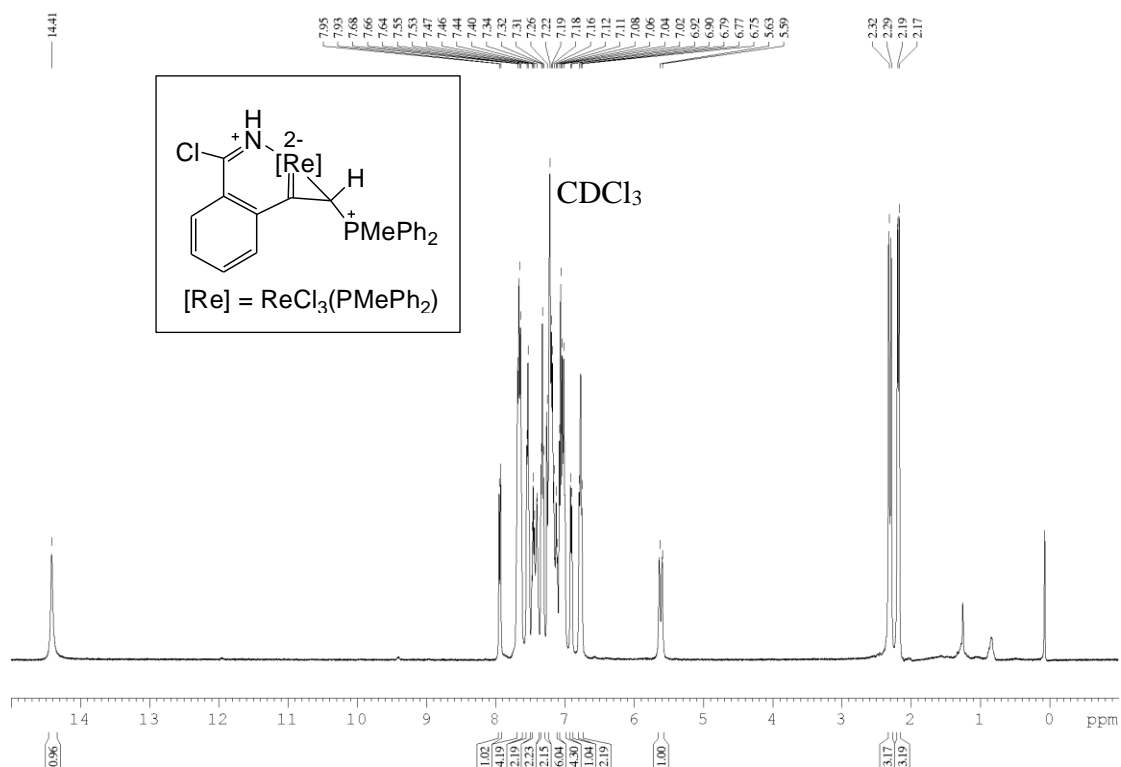

**Figure S10.** The  $^1\text{H}$  NMR spectrum of complex **2** in  $\text{CDCl}_3$  at 400.1 MHz.

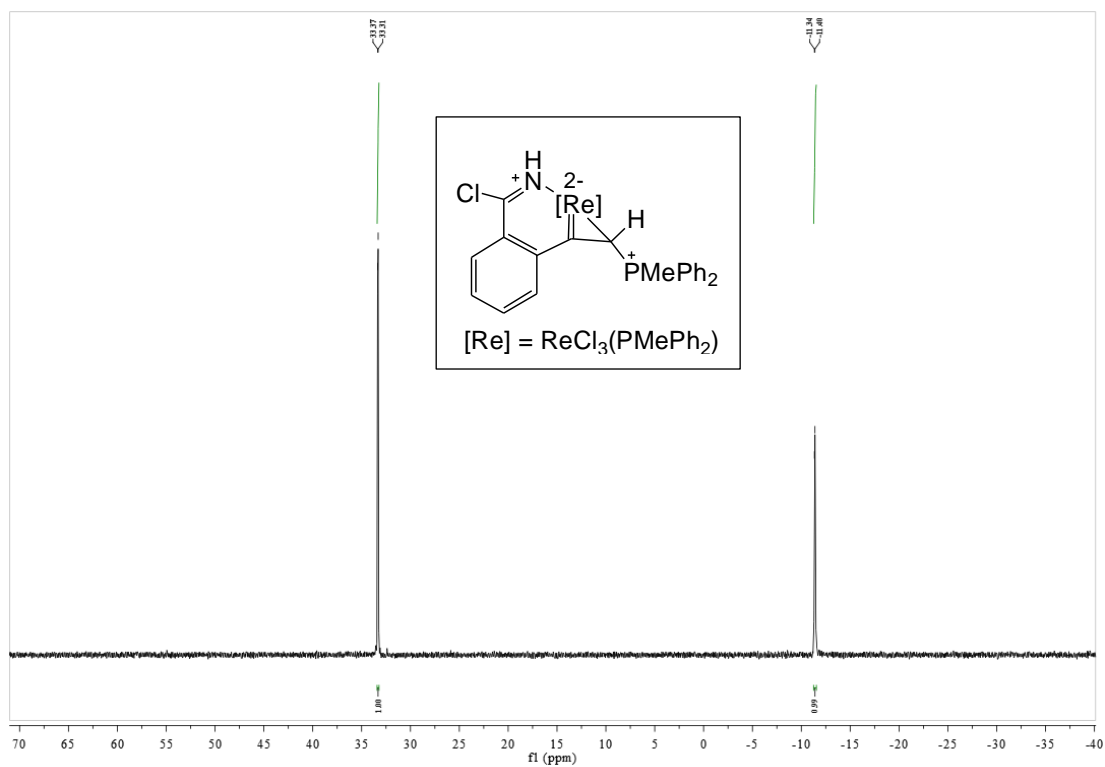

**Figure S11.** The  $^{31}\text{P}\{^1\text{H}\}$  NMR spectrum of complex **2** in  $\text{CDCl}_3$  at 162.0 MHz.

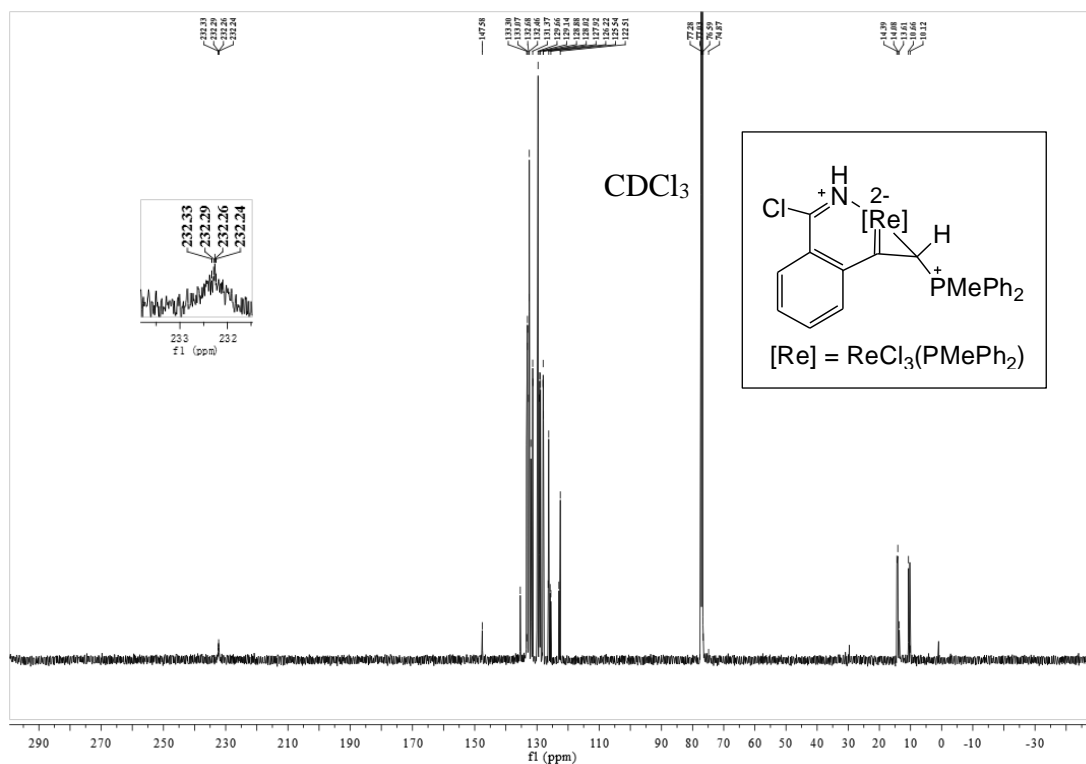

**Figure S12.** The  $^{13}C\{^1H\}$  NMR spectrum of complex **2** in  $CDCl_3$  at 100.6 MHz.

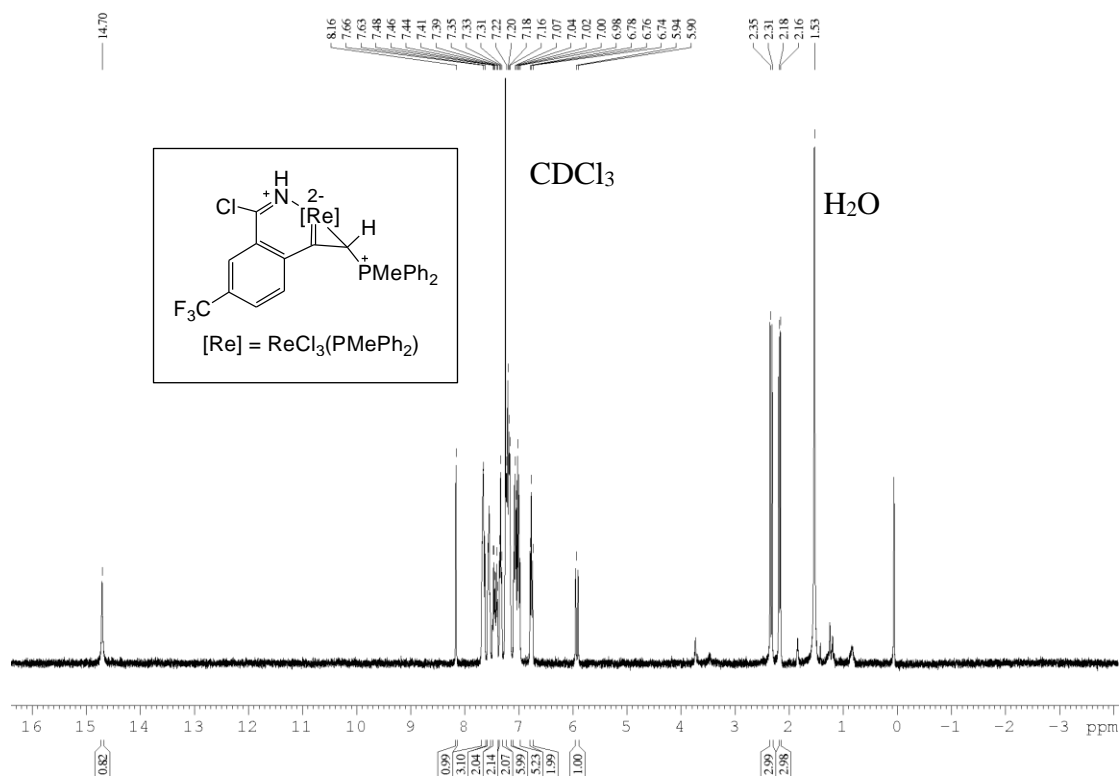

**Figure S13.** The  $^1H$  NMR spectrum of complex **3** in  $CDCl_3$  at 400.1 MHz.



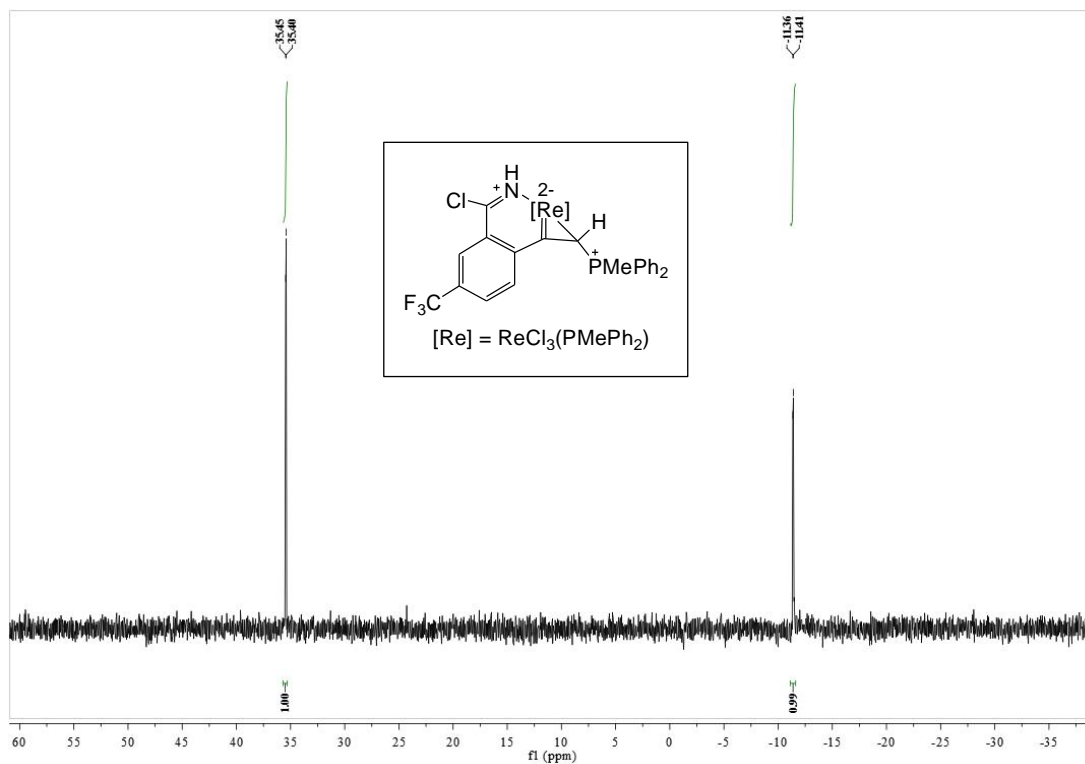

**Figure S14.** The  $^{13}\text{P}\{^1\text{H}\}$  NMR spectrum of complex **3** in  $\text{CDCl}_3$  at 162.0 MHz.

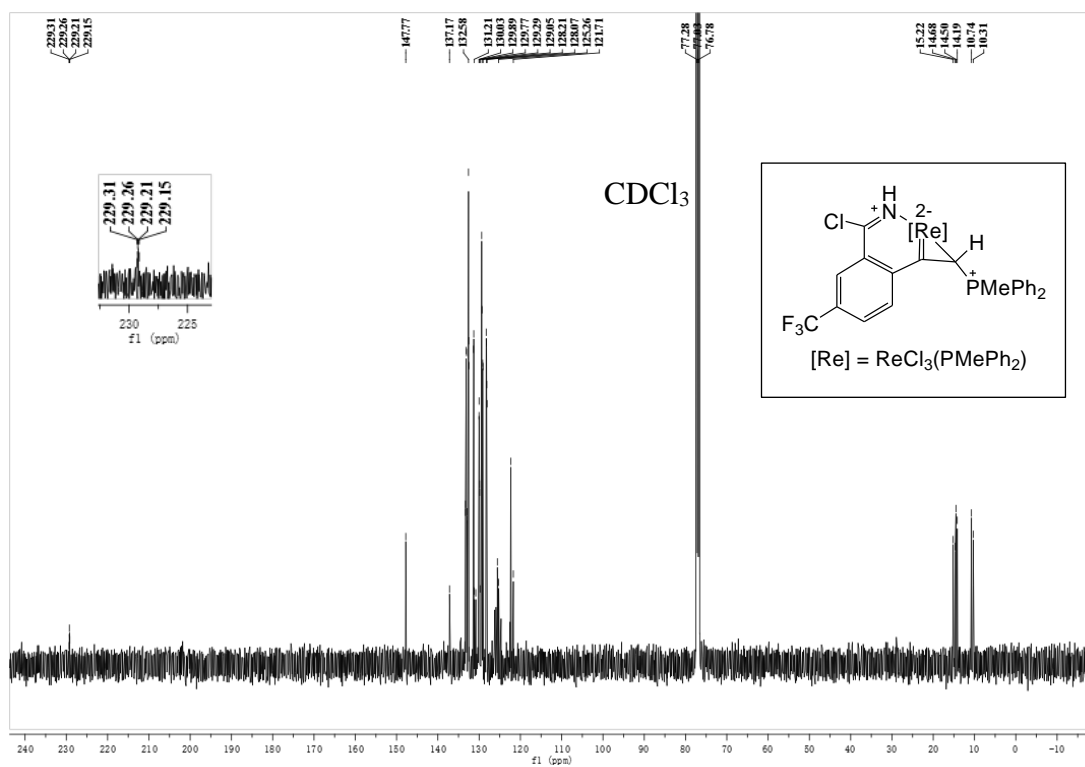

**Figure S15.** The  $^{13}\text{C}\{^1\text{H}\}$  NMR spectrum of complex **3** in  $\text{CDCl}_3$  at 100.6 MHz.

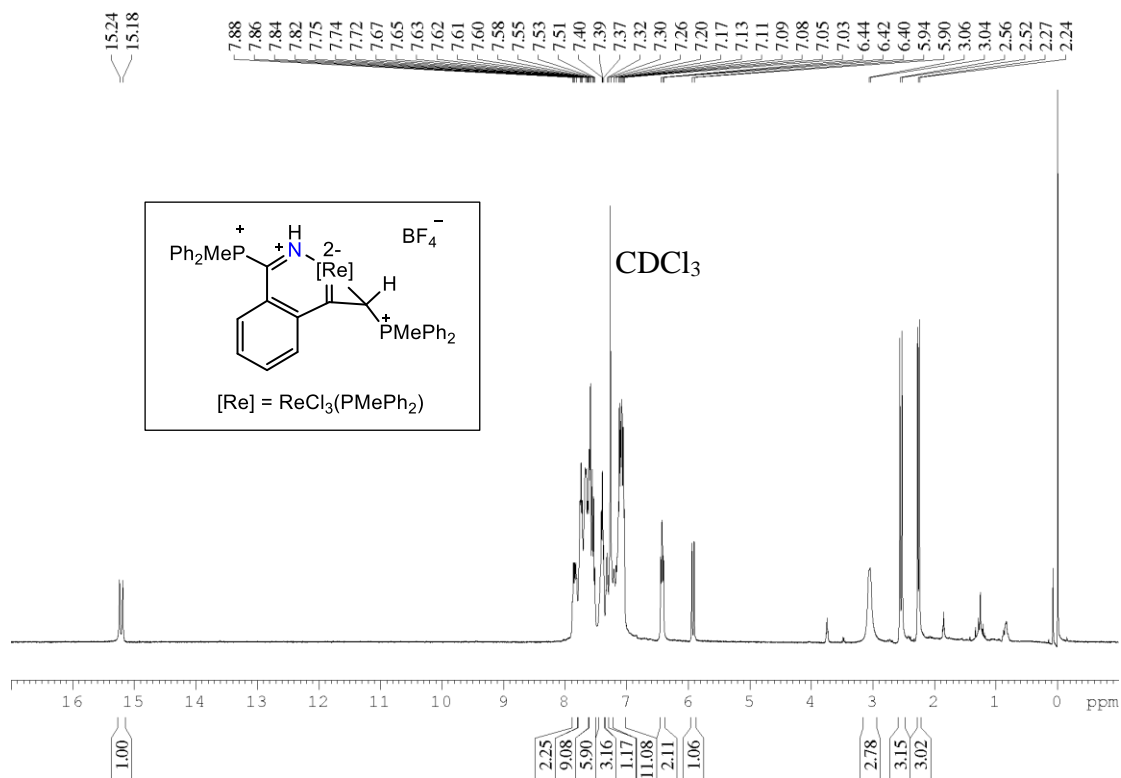

**Figure S16.** The  $^1\text{H}$  NMR spectrum of complex 4 in  $\text{CDCl}_3$  at 400.1 MHz.

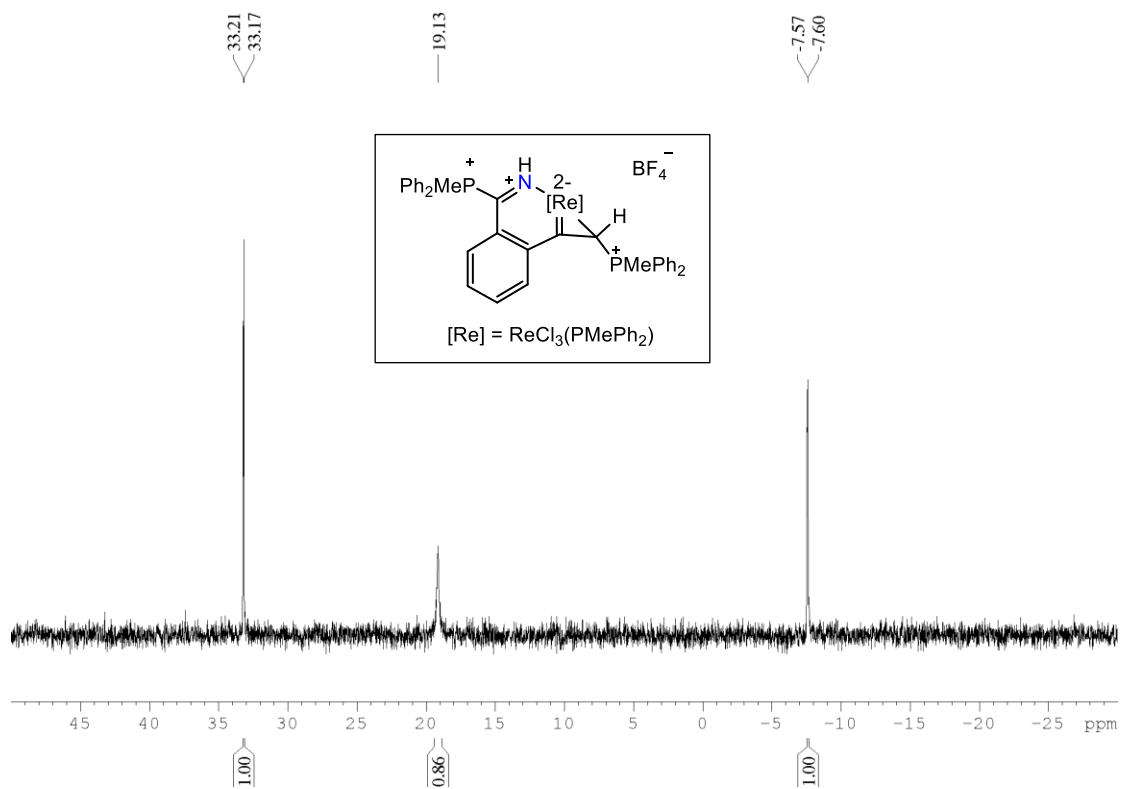

**Figure S17.** The  $^{31}\text{P}\{^1\text{H}\}$  NMR spectrum of complex 4 in  $\text{CDCl}_3$  at 162.0 MHz.

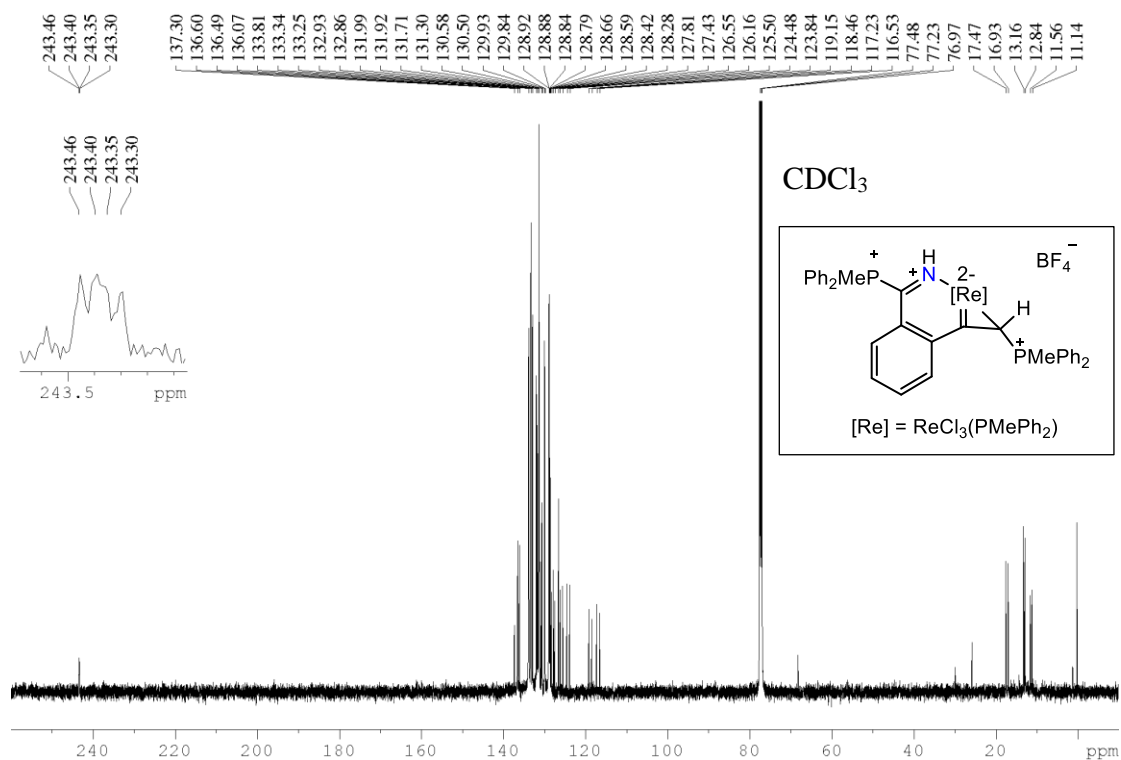

**Figure S18.** The  $^{13}\text{C}\{^1\text{H}\}$  NMR spectrum of complex **4** in  $\text{CDCl}_3$  at 100.6 MHz.

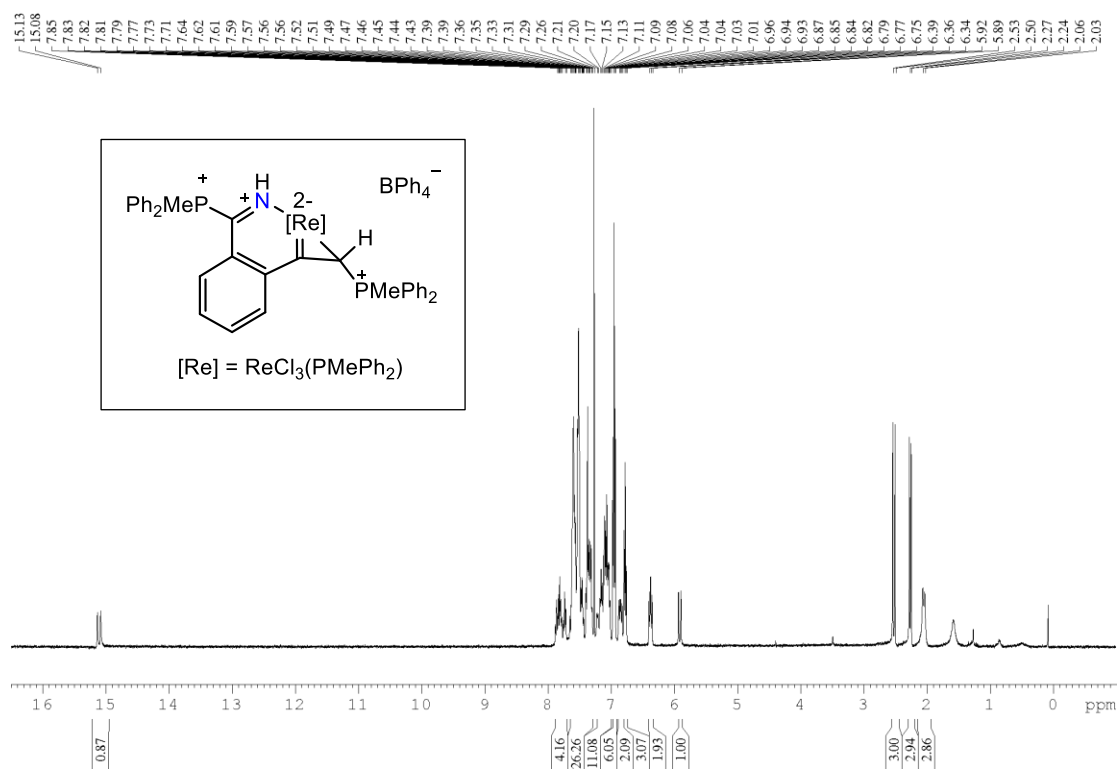

**Figure S19.** The  $^1\text{H}$  NMR spectrum of complex **4**( $\text{BPh}_4^-$ ) in  $\text{CDCl}_3$  at 400.1 MHz.

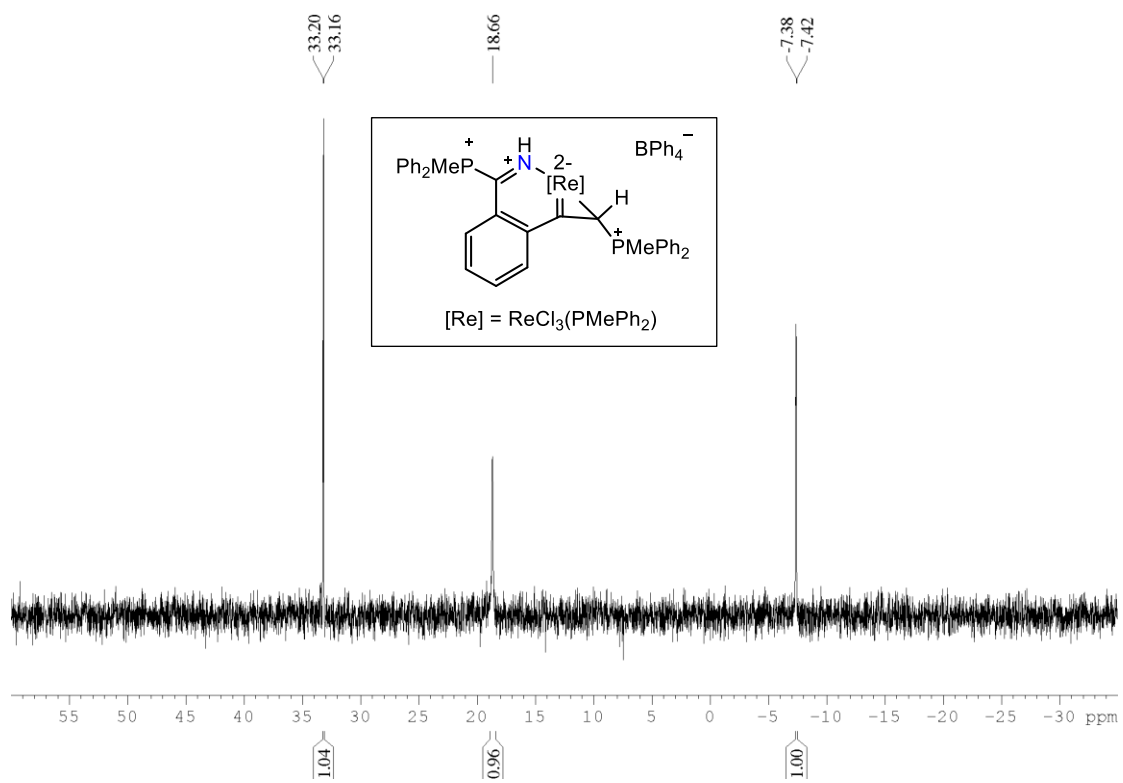

**Figure S20.** The  $^{31}\text{P}\{^1\text{H}\}$  NMR spectrum of complex  $4^+(\text{BPh}_4^-)$  in  $\text{CDCl}_3$  at 162.0 MHz.

#### 4. The Calculated Cartesian Coordinates with Electronic Energies

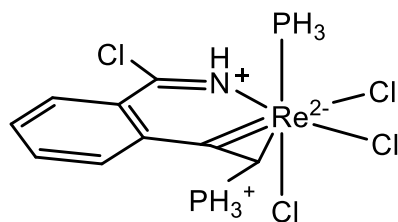

M-N

E = -3007.16424742 A.U.

|    |             |             |             |
|----|-------------|-------------|-------------|
| Re | -0.87019600 | -0.18586800 | 0.06406500  |
| Cl | -1.93675600 | -2.38463100 | -0.39464800 |
| Cl | -1.07846900 | 0.46374800  | -2.30213500 |
| Cl | -3.19729900 | 0.57996300  | 0.43109600  |
| Cl | 2.94852600  | -2.77528300 | -0.75054900 |
| P  | -0.98384200 | 3.01988900  | -0.78311300 |
| P  | -1.08963100 | -0.84984700 | 2.37094100  |
| N  | 0.75004200  | -1.41857100 | -0.32832100 |
| C  | 2.03769600  | -1.32665100 | -0.31725600 |
| C  | 2.76607600  | -0.13479700 | 0.02988800  |
| C  | 2.02129600  | 1.03010700  | 0.37542700  |
| C  | 0.60592200  | 0.98213300  | 0.38994400  |
| C  | -0.47866100 | 1.90029800  | 0.51281000  |
| H  | -0.81725500 | 2.28300800  | 1.47366900  |
| C  | 4.16888000  | -0.07089600 | 0.02810100  |
| H  | 4.73977300  | -0.95052500 | -0.23211600 |
| C  | 4.82323900  | 1.10157700  | 0.34860300  |
| H  | 5.90575800  | 1.12951800  | 0.33958100  |
| C  | 4.09696700  | 2.25142700  | 0.68131500  |
| H  | 4.61730000  | 3.16806800  | 0.93090800  |
| C  | 2.71914900  | 2.21279700  | 0.69329000  |
| H  | 2.14703000  | 3.09280000  | 0.96162500  |
| H  | 0.38716000  | -2.33129500 | -0.60830300 |
| H  | -2.26265200 | -1.54515300 | 2.69510700  |
| H  | -0.12282800 | -1.69752500 | 2.95275100  |
| H  | -1.11526600 | 0.16046100  | 3.35634600  |
| H  | -2.27337100 | 2.80936900  | -1.27361200 |
| H  | -1.04363000 | 4.31463900  | -0.23114200 |
| H  | -0.12089600 | 3.18556400  | -1.86556400 |

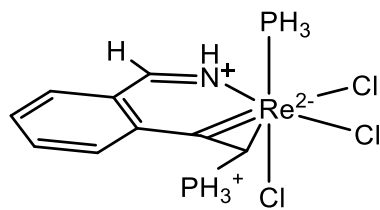

**M-N-H**

E = -2547.54276054 A.U.

|    |             |             |             |
|----|-------------|-------------|-------------|
| Re | -0.73425100 | -0.20001100 | -0.00817100 |
| Cl | -2.35636800 | -1.90965700 | -0.82089900 |
| Cl | -0.86654500 | 1.01253100  | -2.14956100 |
| Cl | -2.77979900 | 0.99744300  | 0.74076100  |
| P  | -0.06656500 | 3.04553400  | -0.12581300 |
| P  | -1.02379400 | -1.30348900 | 2.11143500  |
| N  | 0.48728200  | -1.65769100 | -0.80676100 |
| C  | 1.76336300  | -1.88509800 | -0.90174700 |
| C  | 2.76611800  | -1.01331400 | -0.37220300 |
| C  | 2.38315900  | 0.18525800  | 0.28919100  |
| C  | 1.00418700  | 0.47634900  | 0.42204700  |
| C  | 0.18825700  | 1.56870500  | 0.84283100  |
| H  | -0.00561100 | 1.78646900  | 1.89145600  |
| C  | 4.13022000  | -1.31812300 | -0.51172400 |
| H  | 4.41814400  | -2.23285100 | -1.01767500 |
| C  | 5.09617000  | -0.46517600 | -0.01831400 |
| H  | 6.14479300  | -0.71052900 | -0.13336100 |
| C  | 4.72376700  | 0.72182800  | 0.63003100  |
| H  | 5.48691500  | 1.38753600  | 1.01467800  |
| C  | 3.39043700  | 1.04121800  | 0.78014300  |
| H  | 3.09829700  | 1.95187000  | 1.28985900  |
| H  | -0.10161800 | -2.36712900 | -1.24227600 |
| H  | -2.32023700 | -1.75481900 | 2.39529300  |
| H  | -0.28180600 | -2.46887600 | 2.40201500  |
| H  | -0.74953700 | -0.57403200 | 3.28865600  |
| H  | -1.38486600 | 3.26808300  | -0.52636100 |
| H  | 0.22478300  | 4.15407900  | 0.69351100  |
| H  | 0.76795500  | 3.24691600  | -1.22440600 |
| H  | 2.08806200  | -2.78798700 | -1.41222300 |

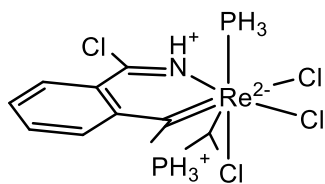

E = -3086.91200242 A.U.

|    |             |             |             |
|----|-------------|-------------|-------------|
| Re | 0.92526500  | 0.31609700  | 0.08007400  |
| Cl | 0.99824500  | 2.13966400  | -1.78569700 |
| Cl | 2.99994200  | -0.82211100 | -0.85795900 |
| Cl | 2.17801700  | 2.12103700  | 1.22726400  |
| P  | 0.34392500  | -0.43495000 | -2.14369800 |
| P  | 0.86938000  | -3.35320300 | 0.38069000  |
| N  | -0.57311600 | 1.62370200  | 0.65846600  |
| H  | -0.17398700 | 2.49542200  | 1.01677100  |
| C  | -0.35135400 | -2.34768300 | 1.30087800  |
| H  | 0.20557000  | -2.05764700 | 2.18956300  |
| C  | -0.51479800 | -1.03569500 | 0.48382300  |
| C  | -1.87362600 | -0.82880000 | -0.02877500 |
| C  | -2.55123300 | 0.42827700  | 0.05706600  |
| C  | -1.85058800 | 1.56767200  | 0.58561800  |
| C  | -2.58707600 | -1.87486000 | -0.66453900 |
| H  | -2.09620200 | -2.82564800 | -0.81963200 |
| C  | -3.86366000 | -1.71459600 | -1.15852200 |
| H  | -4.34860100 | -2.53841500 | -1.66900400 |
| C  | -4.52870100 | -0.49495100 | -1.00630300 |
| H  | -5.53693200 | -0.36721300 | -1.37878100 |
| C  | -3.87516100 | 0.55425900  | -0.40135600 |
| H  | -4.36934100 | 1.51049000  | -0.30430500 |
| H  | 1.90031400  | -2.57539900 | -0.24114400 |
| H  | 1.45204000  | -4.36273600 | 1.16607000  |
| H  | 0.20037600  | -4.08551900 | -0.60918700 |
| H  | 0.12984100  | -1.83305800 | -2.29746900 |
| H  | -0.85702000 | 0.01373500  | -2.71985600 |
| H  | 1.27348600  | -0.24717500 | -3.16708100 |
| C  | -1.54060200 | -3.18073300 | 1.81548300  |
| H  | -2.27224100 | -2.50819000 | 2.26551000  |
| H  | -2.05869800 | -3.76417300 | 1.05774900  |
| H  | -1.19869300 | -3.86495800 | 2.59602100  |
| C  | 1.87570200  | -0.67156200 | 1.82508500  |
| H  | 1.28303700  | -0.49324900 | 2.72936600  |
| H  | 2.09898900  | -1.74097900 | 1.76133000  |
| H  | 2.83547800  | -0.18179100 | 1.94218500  |
| Cl | -2.76934900 | 2.95950500  | 1.14941700  |

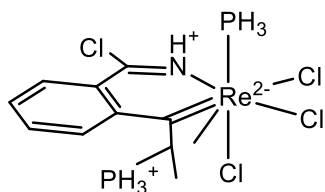

E = -3086.934689 A.U.

|    |             |             |             |
|----|-------------|-------------|-------------|
| Cl | 1.99041900  | -2.66075500 | -0.41080100 |
| Cl | 0.95005800  | -0.88715500 | 2.26955300  |
| Cl | 2.63673300  | 1.18499300  | 0.54736900  |
| P  | 2.46137800  | -0.22331800 | -1.89577400 |
| P  | 0.75114400  | 2.66794500  | 1.90042700  |
| C  | -0.07514400 | 2.63826800  | 0.24836600  |
| H  | -0.98207800 | 3.20196600  | 0.47818500  |
| C  | -0.45410000 | 1.16273500  | -0.07760500 |
| C  | -1.91934800 | 1.04939300  | -0.31695000 |
| C  | -2.11061500 | -1.35555400 | 0.41338400  |
| C  | -2.61514400 | 2.13216700  | -0.90108000 |
| H  | -2.06599200 | 3.01784000  | -1.18719500 |
| C  | -3.97156700 | 2.11404200  | -1.16821300 |
| H  | -4.43601200 | 2.97569100  | -1.63357000 |
| C  | -4.73231700 | 0.99938600  | -0.83505900 |
| H  | -5.79862300 | 0.97577700  | -1.01918900 |
| C  | -4.09827500 | -0.09317500 | -0.27994800 |
| H  | -4.67810800 | -0.97168600 | -0.03973100 |
| H  | 2.60145800  | 1.00546400  | -2.58165700 |
| H  | 3.77898800  | -0.44001900 | -1.47987000 |
| H  | 2.35117600  | -1.09460500 | -2.98787100 |
| H  | 1.88817500  | 3.46741800  | 2.02169300  |
| H  | -0.16039300 | 3.37054000  | 2.71957000  |
| H  | 0.89284500  | 1.42170800  | 2.53882000  |
| Re | 0.74084800  | -0.38509600 | -0.17421700 |
| C  | 0.68530100  | 3.42048500  | -0.83313400 |
| C  | -2.71390600 | -0.11048000 | -0.04472100 |
| C  | -0.18195800 | -0.95286400 | -2.13264400 |
| H  | 0.08766700  | 3.42436600  | -1.74658500 |
| H  | 0.85021600  | 4.46081500  | -0.53820200 |
| H  | 1.64377700  | 2.96183900  | -1.05595400 |
| H  | -1.26428500 | -0.95860100 | -2.03094700 |
| H  | 0.05060000  | -0.24598700 | -2.93308700 |
| H  | 0.15406200  | -1.94634200 | -2.42624800 |
| N  | -0.87382500 | -1.63093500 | 0.32955600  |
| H  | -0.58205200 | -2.55069600 | 0.65969700  |
| Cl | -3.15624700 | -2.60605700 | 1.09372500  |



## References

- [1] Gaussian 16, Revision A.03, M. J. Frisch, G. W. Trucks, H. B. Schlegel, G. E. Scuseria, M. A. Robb, J. R. Cheeseman, G. Scalmani, V. Barone, G. A. Petersson, H. Nakatsuji, X. Li, M. Caricato, A. V. Marenich, J. Bloino, B. G. Janesko, R. Gomperts, B. Mennucci, H. P. Hratchian, J. V. Ortiz, A. F. Izmaylov, J. L. Sonnenberg, D. Williams-Young, F. Ding, F. Lipparini, F. Egidi, J. Goings, B. Peng, A. Petrone, T. Henderson, D. Ranasinghe, V. G. Zakrzewski, J. Gao, N. Rega, G. Zheng, W. Liang, M. Hada, M. Ehara, K. Toyota, R. Fukuda, J. Hasegawa, M. Ishida, T. Nakajima, Y. Honda, O. Kitao, H. Nakai, T. Vreven, K. Throssell, J. A. Montgomery, Jr., J. E. Peralta, F. Ogliaro, M. J. Bearpark, J. J. Heyd, E. N. Brothers, K. N. Kudin, V. N. Staroverov, T. A. Keith, R. Kobayashi, J. Normand, K. Raghavachari, A. P. Rendell, J. C. Burant, S. S. Iyengar, J. Tomasi, M. Cossi, J. M. Millam, M. Klene, C. Adamo, R. Cammi, J. W. Ochterski, R. L. Martin, K. Morokuma, O. Farkas, J. B. Foresman, and D. J. Fox, Gaussian, Inc., Wallingford CT, 2016.
- [2] a) A. D. Becke, *J. Chem. Phys.* 1993, **98**, 5648-5652; b) B. Miehlich, A. Savin, H. Stoll, H. Preuss, *Chem. Phys. Lett.* 1989, **157**, 200-206; c) C. Lee, W. Yang, R. G. Parr, *Phys. Rev. B.* 1988, **37**, 785-789.
- [3] a) F. Weigend, R. Ahlrichs, *Phys. Chem. Chem. Phys.* 2005, **7**, 3297-3305; b) F. Weigend, *Phys. Chem. Chem. Phys.* 2006, **8**, 1057-1065.
- [4] P. J. Hay, W. R. Wadt, *J. Chem. Phys.* 1985, **82**, 299-310.
- [5] a) P. v. R. Schleyer, C. Maerker, A. Dransfeld, H. Jiao, N. J. R. v. E. Hommes, *J. Am. Chem. Soc.* 1996, **118**, 6317-6318; b) Z. Chen, C. S. Wannere, C. Corminboeuf, R. Puchta, P. v. R. Schleyer, *Chem. Rev.* 2005, **105**, 3842-3888; c) H. Fallah-Bagher-Shaidaei, C. S. Wannere, C. Corminboeuf, R. Puchta, P. v. R. Schleyer, *Org. Lett.* 2006, **8**, 863-866.
- [6] a) R. Herges, D. Geuenich, *J. Phys. Chem. A* 2001, **105**, 3214-3220. a) D. Geuenich, K. Hess, F. Kçhler, R. Herges, *Chem. Rev.* 2005, **105**, 3758-3772.
- [7] J. W. Storer, D. J. Giesen, C. J. Cramer, and D. G. Truhlar, *J. Comput.-Aided Mol. Des.* 1995, **9**, 87-110.
- [8] C. M. Breneman, and K. B. Wiberg, *J. Comput. Chem.* 1990, **11**, 361-373.
- [9] D. W. Szczepanik, RunEDDB, available at: <http://eddb.pl/runeddb/>.
- [10] D. W. Szczepanik, M. Andrzejak, K. Dyduch, E. Zak, M. Makowski, G. Mazur, and J. Mrozek, *Phys. Chem. Chem. Phys.* 2014, **16**, 20514-20523.
- [11] a) T. Lu, F. Chen, *Acta Chim. Sinica* 2011, **69**, 2393-2406; b) T. Lu, F. Chen, *J. Comput. Chem.* 2012, **33**, 580-592.
- [12] W. Humphrey, A. Dalke, K. Schulten, *J. Mol. Graphics* 1996, **14**, 33-38.
